# Supplementary material
Source: publisher figshare collection journal article supplement (https://springernature.figshare.com/ndownloader/files/21997053)
Supplement: Supplementary file 1 [file 21997053]

1 **A registered replication study on oxytocin and trust**

2  
3 **Carolyn Declerck<sup>1</sup>, Christophe Boone<sup>1</sup>, Loren Pauwels<sup>1</sup>, Bodo Vogt<sup>2</sup>, Ernst Fehr<sup>\*3</sup>**

4  
5 <sup>1</sup> Faculty of Business and Economics, University of Antwerp, Belgium

6 <sup>2</sup> Chair in Empirical Economics and Health Economics, Otto-von-Guericke-University  
7 Magdeburg, Germany

8 <sup>3</sup> Laboratory for Social and Neural Systems Research, Dept. of Economics, University of Zurich,  
9 Switzerland

10  
11 Corresponding author: Ernst Fehr (ernst.fehr@econ.uzh.ch)

12  
13 **In an influential paper, Kosfeld et al. (2005) showed that intranasal administration of**  
14 **Oxytocin (OT) increases the transfers made by investors in the trust game – suggesting that**  
15 **OT increases trust in strangers. While subsequent studies investigating the role of OT in the**  
16 **trust game found inconclusive effects on the trusting behavior of investors, they deviated**  
17 **from the Kosfeld et al. study in an important way as they did not implement a minimal social**  
18 **contact between the investors and the trustees in the trust game. Here, we will carry out a**  
19 **large double blind and placebo controlled replication study of the effects of OT on trusting**  
20 **behavior that implements the minimal social contact condition and compares it with a no-**  
21 **social-contact condition. The sample generates a power of more than 95% to detect a true**  
22 **effect of OT on trusting behavior in the trust game.**

All positive human relationships involve trust, making it one of the most widely-studied topics in the social sciences. To learn more about the biological basis of trust, researchers have investigated the potential causal link with the hormone oxytocin (OT), a neuropeptide with a central role in regulating social approach and attachment behaviors in many non-human mammals<sup>1-3</sup>. In humans, OT is mostly known for its functions in childbirth and breastfeeding, but it can also alleviate social stress, for example, by lowering salivary cortisol levels<sup>4</sup>, increasing parasympathetic control of the heart<sup>5</sup>, and attenuating amygdala activation in response to seeing faces<sup>6,7</sup>. It is therefore possible that OT could reduce social apprehension between strangers and facilitate trust.

This question has sparked more than a decade of research ever since the first report that administering a single dose of intranasal OT (compared to placebo) increases the willingness to trust in a dyadic economic game with real monetary stakes<sup>8</sup>. In this game, two anonymous players are assigned the role of either an investor or a trustee, and both the investor and the trustee have the same monetary endowment. The investor can transfer money from his endowment to the trustee, knowing that the transferred amount will be multiplied by a factor of three. The trustee, who now enjoys a substantial financial advantage, can honor the investor's decision with a back transfer, thus sharing the proceeds of the investment. When the investor entrusts a large amount and the trustee is fair by sending back, say, 50% of the available amount, both earn a higher income. However, the trustee can also act selfishly and keep everything for himself, making the investor worse off than if he had not trusted at all. The highly interdependent nature of this game thus places the burden of uncertainty on the investor, because the investor does not know how the trustee will respond to his transfers. If

both players are selfish and know that their partner is selfish the investor will transfer nothing because he or she knows that the trustee will maximize self-interest and return nothing. This solution is, however, suboptimal because it reduces the payoffs for both the investor and the trustee relative to what they could have earned if the investor trusts fully and the trustee behaves trustworthily.

Money transfers in the trust game indicate that investors are willing to tolerate a certain level of uncertainty. Interestingly, the worry that another person may not reciprocate appears to influence transfers beyond the perceived riskiness of the game<sup>9,10</sup>, i.e., it is not just the risk of losing money but the fear of being cheated (i.e., betrayal aversion) that inhibits the investors' trust. Kosfeld et al.<sup>8</sup> hypothesized that if trust entails overcoming the fear of betrayal in order to attain a profitable interaction, the psychophysiological mechanisms underlying trusting decisions might be similar to those underlying social attachment in other mammals and, therefore, OT might facilitate trusting behavior - a view that is consistent with the results in Kosfeld et al.<sup>8</sup>

Cited more than 1600 times in the Web of Science (and more than 3500 times in Google Scholar, as of August 22, 2018), the Kosfeld et al.<sup>8</sup> study has become a classic reference in both theoretical and empirical studies on human social behaviors, including not only trust, but also social cognition<sup>11-13</sup>, empathy<sup>14,15</sup>, and group dynamics<sup>16,17</sup>. However, the mounting popularity of studying OT in the social sciences is currently associated with waves of criticism, because papers often have suffered from small sample size, low statistical power, inflated effect sizes, inconsistent experimental procedures and publication bias<sup>18,19</sup>. Other critics have pointed out that there is no overarching theory to explain the diverse findings resulting from intranasal OT

administration<sup>20</sup>. More specifically, Nave and colleagues<sup>21</sup> have raised doubt on the robustness of the oxytocin-trust association, pointing out that six studies failed to replicate the initial findings reported by Kosfeld et al.<sup>8</sup>. These studies were, however, not direct replications, i. e., they did not use the same methods and procedures as the original study.

To move forward with a research paradigm on the biological basis of trust that includes a role for OT, it is essential to clarify whether OT increases trust, and if so, to establish the conditions under which this is the case. Because animal research has documented that OT is primarily a social bonding hormone that activates socio-emotional neural pathways in the brain<sup>22,23</sup>, we would also expect the effect of OT in humans to be limited to social situations where initiating or establishing partnership is important to realize synergy. The Kosfeld et al. study<sup>8</sup> already suggested this: OT increased trusting decisions in the trust game, but did not augment risk-taking in an identically framed risk game played against a computer. To enhance the saliency of the social context, participants in the trust game had some minimal social (face-to-face) contact with each other in groups prior to playing the game against someone whose exact identity would not be revealed. Importantly, the social contact had to be minimal to avoid elevating trust to a level beyond which no further increase could reasonably be expected after OT administration. The following two conditions thus needed to be fulfilled: (i) the social contact took place before participants knew they would play the trust game so that they could not communicate about it, as communication is known to substantially increase cooperation in social dilemma games (such as the trust game)<sup>24</sup>. (ii) Social contact was not intense enough to cause strong feelings of social familiarity, as this might also generate a ceiling effect in trust.

88 Despite the enormous resonance of the Kosfeld<sup>8</sup> et al. study, the minimal social contact  
89 feature of the study has often been overlooked or neglected. In fact, replication studies so far  
90 neglected several key features of the trust game played in Kosfeld et al.<sup>8</sup> Of the six studies that  
91 entered the meta-analysis in Nave et al.<sup>21</sup> – in addition to the Kosfeld<sup>8</sup> et al. study – four studies  
92 had fictional partners<sup>25-28</sup>, one was completely devoid of human contact with other  
93 participants<sup>29</sup>, and participants' previous experience in a dictator game was likely to confound  
94 the decision to trust in the sixth study<sup>30</sup>. In this last case, the investor was matched with a  
95 partner whom he had been enticed to treat unfairly in an immediately preceding dictator game,  
96 which probably altered the investors' beliefs about this partner's trustworthiness. Thus each of  
97 the six additional studies in Nave et al.<sup>21</sup> had one or more problematic features.

98 The importance of establishing some minimal social contact with real partners was  
99 corroborated in a large (N = 254) behavioral study<sup>31</sup> in which participants, who did not know  
100 each other's identity, needed to trust each other to jointly solve a coordination game. In this  
101 two-person simultaneous move game, participants had the choice of playing a safe strategy  
102 which ensured a low positive payoff without any (social) risk, but they also could achieve a high,  
103 mutually advantageous, payoff if they played the alternative strategy and the partner matched  
104 their choice. However, if the partner did not match their choice of the alternative strategy the  
105 participants earned much less than what they would have earned under the safe strategy. Thus,  
106 the alternative strategy was risky and the players' had to trust that the partner matched their  
107 risky choice when playing the alternative strategy.

108 It turned out that intranasal OT significantly increased coordination on the mutually  
109 beneficial alternative strategy, but only if participants first had the opportunity to introduce

themselves to the whole group of participants from which one was randomly drawn to become the partner. Without this prior contact, OT significantly reduced coordination on the alternative strategy.<sup>31</sup> Since the publication of this study, increasing evidence suggests that OT's function is not always consistent with facilitating social approach, but that administering intranasal OT can also lead to parochial, competitive, and envious behaviors and behaviors that appear to be driven by schadenfreude<sup>16,17,32</sup>, which have an anti-social dimension. This points to the need of examining the conditions under which – and how – OT modulates social behavior<sup>33,34</sup>.

A current leading theory to account for why OT can stimulate both prosocial and anti-social behaviors rests on neurological evidence that OT modulates mesolimbic dopaminergic neurons, thereby affecting both incentive motivation as well as attention re-orienting. By boosting the dopaminergic signal in the mesolimbic network, OT is thought to enhance the salience of social cues that emphasize the value of approach behavior<sup>7,35,36</sup>. Framing the effects of OT in terms of assigning salience to social cues highlights the importance of establishing minimal social contact prior to engaging in an interdependent exchange. We propose that minimal social contact is the cue that enhances the prosocial approach potential of OT and reduces social apprehension, thereby enhancing trust in an environment where approach behavior is a precondition for a mutually advantageous exchange.

The purpose of the proposed study is therefore twofold. First, we want to resolve the conflict regarding the impact of intranasal OT on trusting decisions by conducting a controlled replication experiment of the Kosfeld et al.<sup>8</sup> study with sufficient statistical power. Second, we will investigate the importance of providing social cues by differentiating between a minimal social contact and a no contact environment. Both conditions involve real and anonymous

partners, but differ in the degree to which it is possible to establish minimal social contact: in the minimal contact condition the matched players in the trust game will know that they saw each other while waiting together with several others in a common room (following similar procedures as in Kosfeld et al.<sup>8</sup>), while in the no contact condition the players do not meet and hence have no concrete social cue to relate to each other. To summarize, we propose a 2x2 experimental design with OT versus placebo as the main factors in the first dimension and “no contact” versus “minimal social contact” being the main factors in the second. The primary hypotheses are that OT increases trust in the minimal social contact condition, and that this effect of OT on trust is more pronounced than in the no contact condition. Thus, the proposed design enables us to examine the role of OT for investors’ trusting behavior in the trust game and the extent to which this measure of trust is jointly affected by OT and minimal social contact. We believe that these questions are of primary importance for the field of OT research but, naturally, our design does not allow us to make broad conclusions about the general effects of OT on social cognition, empathy or behavior in other experimental paradigms.

## **Methods**

### *Study sample and determination of sample size*

We will conduct the study in two different locations: in Antwerp, Belgium (n = 352) and in Magdeburg, Germany (n = 352) with a total of 704 student participants between 18 and 25 years old. According to the *a priori* power analysis presented in detail below and the robustness check reported in Supplementary Information 1 and 2, a sample size of n = 704 will provide a

statistical power of more than 95% for all main hypotheses and also exceeds the sample size recommendations of Nave et al.<sup>21</sup>.

The sample size for this study is determined based on a series of power analyses in G\*Power 3.1.9.2<sup>28</sup> and the effects reported in Kosfeld et al.<sup>8</sup>. This paper reported three effects:

(i) Comparing a placebo and an OT group in a trust experiment with minimal social contact corresponded to an effect size  $d = 0.514$  ( $r = 0.249$  in a common effect size language).

(ii) They compared the OT group in the trust experiment to the OT group in a risk experiment in which they hypothesized OT would not exert an influence. This yielded an effect size of  $d = 0.701$  ( $r = 0.331$ ), which corresponds to an intermediate effect<sup>37</sup>.

(iii) To bolster their results, Kosfeld et al.<sup>8</sup> assessed the global difference between all four experimental groups under consideration (trust/Placebo, trust/OT, risk/Placebo, and risk/OT) to ensure a family-wise error of  $\alpha = 5\%$ . The reported findings correspond to an  $\eta^2 = 0.071$  ( $r = 0.267$ ).

Kosfeld et al.<sup>8</sup> were forced to use non-parametric tests in their study because their sample did not comply with assumptions made in parametric tests. Specifically, the smallest sample size in testing (i)-(iii) was  $n=29$ . They thus applied Mann-Whitney-U tests in (i) and (ii), but implemented Kruskal-Wallis-H for comparison (iii). Our study will overcome these drawbacks because we will recruit a large sample that will enable us to use OLS regression techniques. Given our 2x2 experimental design, the test that would correspond to (i) compares trust in the minimal social contact condition between the OT and the Placebo group. The test most similar to (ii) compares trust under OT between the no-contact and the minimal social contact condition, and a test similar to (iii) examines whether the trust levels in the four conditions



differ from each other. Note, however, that the tests described in (ii) and (iii) in the Kosfeld study<sup>8</sup> are about comparisons between a *trust* and a *risk* game, which differ substantially from the current design which does not have a *risk* game (i.e., a game played against a computer). Our second factor (minimal social contact versus no contact) establishes variation *within* a trust game played with real partners.

We base our a priori power analysis on the effect size  $d = 0.514$ , reported in test (i) of Kosfeld et al.<sup>8</sup> and the requirement of a one-tailed test, which is justified when testing a directional<sup>38</sup> hypothesis. The power analysis shows that with  $\alpha = .05$ ,  $\beta = .95$ , and a one-tailed t-test we must recruit 166 observation units to detect a significant difference of OT in the minimal contact condition of the proposed experiment (i.e., replicating effect (i), see Supplementary Table 1). Since the proposed experiment will also include a no contact condition, the total necessary sample size is  $166 \times 2 = 332$ . Because we plan to have 16 participants per session with 22 sessions we will have  $n = 352$  participants per location, which gives us in total  $n = 704$  observations. Based on the reported effect size in result (i) of Kosfeld et al.<sup>8</sup>, the overall sample size of  $n = 704$  will provide a statistical power of 99.65%.

However, because of publication bias and other reasons the first results of a study design such as Kosfeld et al.<sup>8</sup> may overstate the true effect size, we conduct a further robustness check in our a priori power analysis by applying Simonsohn's "small telescopes" approach for replication studies<sup>39</sup>. Instead of pondering whether or not it is adequate to assume an effect size of 0.514, the small telescopes approach assesses whether the replication is sufficiently powered so that it is able to detect an effect reported in an original study that may have been "small" or "underpowered". In addition, it differentiates noisy replication effects (yielding  $p >$

.05) from those that genuinely indicate the effect is undetectably different from zero. Specifically, the small telescopes method first ask what effect size  $d^*$  would give the original study 33% statistical power. Then, in a second step, one computes the number of observations that is necessary to achieve 80% power to detect the relatively small effect size  $d^*$  in the replication study. According to this method, already an overall sample size of  $n = 488$  yields an adequate replication of the Kosfeld study<sup>8</sup> (see Supplementary Table 2).

#### Exclusion criteria

We limit recruitment to male participants for several reasons. First, the main motivation for the study is to replicate the Kosfeld et al.<sup>8</sup> study, which was conducted only with males. Second, we know from the previous literature that sex-specific gonadal steroids influence OT-receptor binding in the brain, and that intranasal oxytocin can affect the behavior of males and females differently, even in opposite directions<sup>40</sup>. Such inter-individual differences might introduce excessive noise in the data which could obscure the results. Third, for practical reasons (given that oxytocin induces labor), we wanted to avoid having to administer pregnancy tests to all female participants, which would be required by Ethics Commissions. Finally, in pilot studies (see Supplementary Table 3a) conducted to develop an appropriate minimal social contact condition that avoids ceiling effects, we noted that the gender composition of the social group had a significant impact on subsequent trusting behavior (Supplementary Table 3b).

Other exclusion criteria for participation include (1) psychiatric disorders that may impact the expected effects of OT in healthy populations, and (2) somatic conditions that may impact effective absorption of intranasal OT. To identify psychiatric symptoms, online registration will

219 include a questionnaire with the following items: (a) Have you ever been diagnosed with a  
220 psychiatric disorder? (b) Have you experienced recurrent problems with substance abuse? (c)  
221 Are you currently or have you in the past been seeing a psychiatrist, psychologist, or  
222 psychotherapist? (d) Do you currently or have you in the past taken psychoactive medication,  
223 i.e., sleep medication, anxiety medication, antipsychotics, or antidepressants? If the answer is  
224 “yes” to any of these questions, the participant will be contacted by a certified psychologist  
225 who will conduct a structured interview to determine if the condition meets diagnostic criteria  
226 for psychiatric disorders in DSM-IV. Based on the psychologist’s diagnostic report we will  
227 consider the following disorders as exclusion criteria for the current study: psychotic disorders  
228 or mood disorders with psychotic features; major depressive or (hypo)manic episode;  
229 generalized anxiety disorder; panic disorder; agoraphobia or social phobia; obsessive  
230 compulsive disorder; alcohol abuse and dependence, and non-alcoholic psycho-active  
231 substance use disorder.

232 To identify somatic conditions, we query participant’s history of nasal diseases by (i) asking if  
233 participants ever had surgery on the nose and (ii) by administering a standardized and validated  
234 questionnaire for subjective assessment of nasal obstruction (NOSE)<sup>41,42</sup>. Participants who have  
235 had surgery on the nose or who score in the “severe” range on the NOSE questionnaire<sup>41</sup> are  
236 excluded from further data analysis.

237 Via a post experimental questionnaire, we identify two *post hoc* exclusion criteria: (1)  
238 suffering from a common cold or allergic rhinitis on the day of the experiment, which will be  
239 assessed subjectively using the standardized Visual Analogue Scale (VAS). The VAS comprises a  
240 10 point scale whereby the extreme cases are given by “nose feels extremely clear,” (= 0) and

“nose feels extremely blocked.” (= 10). The score on this scale has been shown to correlate specifically with inspiratory flow in the upper nasal cavity<sup>43,44</sup>. Participants who have a score  $\geq 8$  on the VAS are considered to have severe nasal obstruction<sup>43</sup> and will be removed from the data before analyses. We also assess (2) compliance with the online registration instructions to abstain for at least 12 hours from alcohol, non-prescription drugs, and heavy smoking (>20 cigarettes) prior to attending the experiment. Because of the anti-diuretic properties of OT, we ask participants to restrict their general consumption of liquids (e.g. water) two hours prior to the experiment to prevent an inadvertent increase of the possibility of water intoxication. Participants who indicate on the day of the experiment that they drank more than one liter in the hour preceding the experiment will not be allowed to self-administer the spray and will no longer be included in the dataset. We will also exclude participants from the dataset based on their answer to specific questions regarding tobacco-, alcohol- and drug use. We will exclude the data of participants who smoked > 20 cigarettes or drank any alcohol on the day of the experiment, and of participants who used non-prescription (recreational) drugs on the day or the night before the experiment. We deliberately collect information about these behaviors immediately after the experiment (i.e., after participants have been paid) so that they have no incentive to lie.

A final criterion is participants’ understanding of the trust game instructions. We will check this by letting them compute the monetary payoffs for both players in two hypothetical examples of the trust game. Both examples need to be solved correctly to be included in the data analyses.

Participants will be recruited by e-mail and announcements posted on the university's electronic learning platform (Antwerp), or via an existing participant pool platform (Magdeburg) that introduces the study as "The psychobiological foundations of decision-making". Participation will be voluntary, and all participants will sign an informed consent form. The proposed study will be carried out with the approval of the Medical Ethics Commissions of the Universities of Antwerp and Magdeburg.

### **Study design**

We will test the combined effects of OT and minimal social contact on trust in a  $2 \times 2$  factorial design (OT/placebo x minimal social contact/no contact), where each treatment is a between factor. Participants' level of trust (the dependent variable) will be assessed with a single decision in a dyadic incentivized trust game (similar to Berg and colleagues<sup>45</sup>). Trust is measured by how many euros participants in the role of the investor are willing to transfer to another participant, the trustee. Measuring trust with a single decision (rather than averaging several consecutive decisions) has the advantage that it prevents hedge betting and may thus encourage intuitive thinking, which is the decision making type OT is most likely to influence,<sup>7,47</sup> rather than complicated deliberation.

The trust game is programmed in z-tree<sup>47</sup>, and played on computers linked in a local network. The script will be made accessible via the Open Science Framework. Each person in a dyad is assigned the role of an investor or a trustee. As in Kosfeld et al.<sup>8</sup>, both the investor and the trustee receive an initial endowment of 12 euros, and the investor can decide to send 0, 4, 8, or 12 euros to the trustee. The experimenter triples each euro the investor transfers, and this

amount is added to the initial 12 euro endowment of the trustee. Then the trustee has the option of sending back any amount between zero and the total amount available to him. The experimenter does not triple the back transfer. The investor's payoff corresponds to the initial endowment minus the transfer to the trustee, plus the back transfer from the trustee. The trustee's payoff is given by his initial endowment plus the tripled transfer of the investor, minus the back transfer to the investor.

Each participant will play this game twice, with two different partners: first as an investor, and then as a trustee. This ensures that for every investment decision there is also a trustee who decides on a back transfer. The first game in the role of the investor occurs without knowing that there will be a second game in the role of a trustee, and no feedback will be given in between games. In both roles, participants play the trust game for real money.

Participants will be randomly assigned to one of the four treatment conditions (no contact/Placebo, no contact/OT, minimal social contact/Placebo, minimal social contact/OT) but randomization will be stratified based on participants' social value orientation (SVO) which will be measured during registration two weeks prior to the experiment with an online survey. This stratification ensures that the distribution of individuals' SVOs will be the same in each treatment condition. SVO is a relatively stable personality feature describing a person's intrinsic willingness to behave prosocially<sup>48</sup>, that has been found to predict trusting decisions<sup>49</sup> and sensitivity to social cues<sup>50</sup>. OT/placebo administration will be double blind following a randomized block design (with a block corresponding to a session).

## **Spray administration**

A recent study investigating the dose dependency of oxytocin reports that a dose of 24 IU OT is more effective in triggering an amygdala response and eliciting fear reduction compared to either lower (12 IU) or higher (48 IU) doses<sup>51</sup>, although this contradicts an earlier study in which 8 IU was found to be the most effective<sup>52</sup>. The latter study, however, made use of a Breath Powered device for OT administration which is likely to have increased absorption significantly. Because the aim of the study is to replicate the Kosfeld et al.<sup>8</sup> study as close as possible, we will have participants self-administer 24 IU OT or a placebo by means of a metered finger sprayer (see Supplementary Figure 1). The solutions, containing 1 ml of either syntocinon (Novartis) or an isotonic solution with no active ingredient, are prepared by the pharmacy of the University Hospital pharmacy.

As accumulating evidence suggests that the most likely uptake of intranasal OT into the brain occurs directly via the olfactory or trigeminal nerve (rather than via the circulatory system)<sup>53</sup>, participants will receive detailed written and oral instructions (following the guidelines of Guastella et al.<sup>54</sup>, see Supplementary Table 4) to make sure that the spray reaches the posterior upper end of the nasal cavity where absorption can take place. All experimenters will train themselves to use the spray bottles properly. During the experimental session we will have a ratio of one supervisor for 4 participants. The supervisor will take notes on any problems participants may be experiencing with the spray and rate whether they properly self-administered the spray on a 5 point likert scale. If participants are rated as non-compliant with the rules for self-administration (category 5) or the self-administration is judged as problematic by the supervisor (category 4) the participant is ruled out from data analysis. Participants

themselves will also report on a 5 point likert scale the discomfort they experienced (if any) from the spray. Scores on this scale will not serve as exclusion criteria, but will be used in further exploratory analyses to assess if nasal spray discomfort might interfere with proper OT administration and affect the behavioral results.

## **Experimental procedures**

Participant recruitment will start at least two weeks prior to the experiment. Registration occurs online and includes filling out the triple dominance measure for social value orientation (SVO)<sup>48</sup>; the inclusive generalized trust scale<sup>49</sup>, a measure of risk attitude<sup>55</sup>, and two questionnaires assessing attitudes towards social contact (the shortened version of the Autism Spectrum Questionnaire (ATQ10)<sup>56</sup> and the sociability dimension of the HEXACO scale<sup>57</sup>. The trust and risk measures will serve as control variables when testing the primary (*a priori*) hypotheses (described in the next section), while the other variables will serve as moderators in further exploratory analyses.

On the day of the experiment, participants will arrive at the agreed upon time and meeting point. They will be escorted individually to a cubicle in the computer room, at which point they will be asked to sign the informed consent. They will not talk to anyone (except to the room supervisor, if necessary). To guarantee anonymity, their names will from then on be replaced by a self-made, retrievable code through which they can be identified during the remainder of the study.

Participants begin by filling out a 30-item multidimensional mood state (MDMS) questionnaire<sup>58</sup> and subsequently receive guidelines for spray administration. Participants will



then self-administer three puffs of the nasal spray in each nostril, and, following the procedures of Kosfeld et al.<sup>8</sup>, wait 50 minutes before continuing with decision-making in the trust game. During this waiting period the procedures for the no-contact and the minimal social contact condition will differ (see Figure 1).

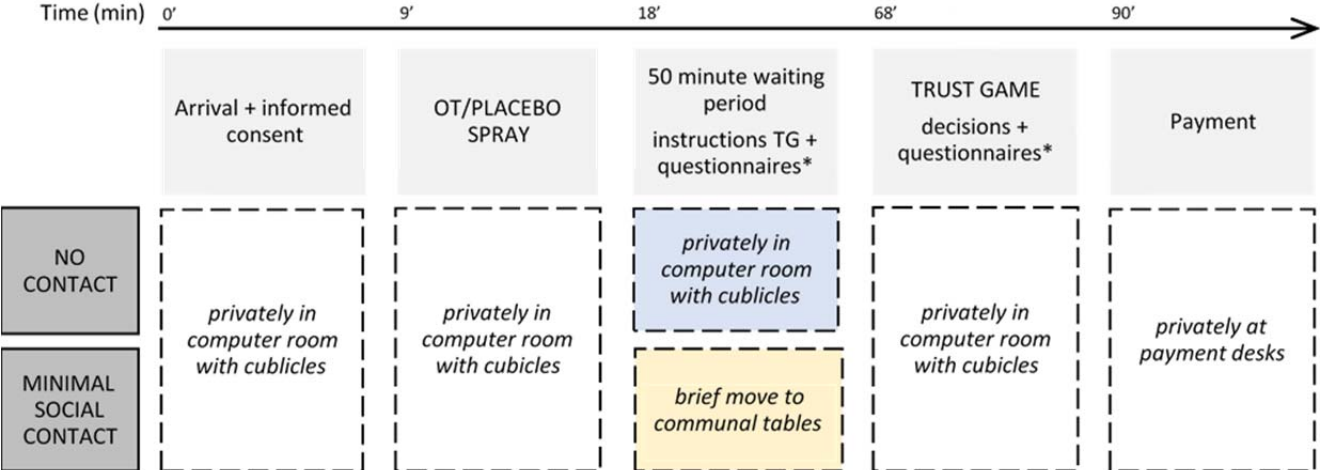

**Figure 1.** Condensed overview showing the main difference between the no-contact condition and the minimal social contact condition. The top arrow represents the time (in minutes) elapsed. The light grey boxes below describe the procedures, while the dotted-line boxes indicate where the experiment is taking place. The two experimental conditions differ only during the 50 minute waiting period. The questionnaires (indicated by \*) are described in the text.

In the no-contact condition, participants will remain seated in their cubicles for the entire waiting period, and will fill out questionnaires that enable us to measure their negative reciprocity (Global Preferences Scale<sup>55</sup>), personality (the HEXACO-100 personality inventory<sup>57</sup>), fluid intelligence (Raven matrices task), and their level of arousal<sup>59,60</sup>. They will also fill out the MDMS questionnaire for a second time. This will enable us to check for mood changes

365 following nasal spray administration. During the last minutes of the waiting period, they will  
366 familiarize themselves with the trust game instructions.

367 In the minimal social contact condition, participants fill out the same questionnaires as in the  
368 no-contact condition. However, after 30 minutes into the waiting period, they will move  
369 together to a common room, where they will be seated at a communal table. They will be told  
370 that they have to sit here for roughly 8 minutes during which they fill out the MDMS and  
371 arousal questionnaires. They are told that they can talk quietly to each other, but they are not  
372 explicitly encouraged to do so. When they are done they will be guided back (as a group) to  
373 their respective cubicles, where they will receive the trust game instructions. From that  
374 moment on, the remainder of the experiment proceeds in the exact same way as in the no-  
375 contact condition.

376 The written instructions for the trust game will vary slightly between the no-contact and the  
377 minimal contact condition. In the no-contact condition, participants will read: *“During the*  
378 *study, you will be randomly matched with a participant from another room. Neither before, nor*  
379 *after the study will you learn the identity of the other participant. In the same way, the other*  
380 *participant will not be informed about your identity.”* In the minimal social contact condition,  
381 participants will read: *“During the study, you will be randomly matched with one of the*  
382 *participants from the other room whom you just met. Neither before, nor after the study will*  
383 *you learn the exact identity of the other participant. In the same way, the other participant will*  
384 *not be informed about your identity.”*

385 After concluding the experiment, participants will answer a post-experimental  
386 questionnaire. Importantly, this questionnaire will query participants’ beliefs regarding the

treatment they received (OT versus placebo) which allows us to test the possibility of a placebo-effect. Finally, a number of questions assess participants' feelings of connectedness with others, which can be used to test if the *minimal social contact* and *no contact* condition differed in this respect.

Participants are remunerated for their participation. They receive the earnings from the decisions they made as described in the experimental instructions, plus a 5 euro compensation for filling in the questionnaires.

## **Data analysis**

### *Hypothesis testing*

The dependent variable will be the investor's trust level in the various treatment conditions. The main explanatory variables are the treatment conditions. We pool the data obtained in Magdeburg and Antwerp because there is no a priori reason to expect that OT would affect individuals from these two locations differently. In addition, pilot studies conducted during the time span December 2017-March 2018 revealed very similar trusting behaviors between the two locations (Supplementary Table 3a and Supplementary Figure 2). But to be on the safe side we will still control for generalized trust<sup>49</sup> and general risk attitude<sup>55</sup> in our regressions. Adding these two covariates will also reduce the standard errors in our treatment estimates – thus allowing sharper estimates – and correct for potential imbalances in the samples that occur through imperfect randomization. We do not plan to include social value orientation<sup>48</sup> as a covariate because we control for SVO via stratified randomization. We will run the following

OLS-regression where T = Trust; OT = Oxytocin treatment; MSC = minimal social contact condition; NoC = no contact condition):

$$T = \beta_o + \beta_1 OT + \beta_2 MSC + \beta_3 OT \times MSC + controls (generalized\ trust, risk\ attitude)$$

In this regression, the Placebo/NoC treatment is the omitted category and  $\beta_o$  measures the trust level in this treatment. Neglecting the covariates, the average trust levels in the four treatments are given by the matrix in Table 1:

|                              | Placebo (P)         | Oxytocin (OT)                           |
|------------------------------|---------------------|-----------------------------------------|
| No Contact (NoC)             | $\beta_o$           | $\beta_o + \beta_1$                     |
| Minimal Social Contact (MSC) | $\beta_o + \beta_2$ | $\beta_o + \beta_1 + \beta_2 + \beta_3$ |

**Table 1.** Regression coefficients estimating trust in each of the four experimental conditions

We test the following *a priori* hypotheses regarding the effect of OT and express them also in terms of the coefficients of the above regression model:

**H1:** OT has a positive influence on trust in the MSC condition, i.e.,  $\beta_1 + \beta_3 > 0$ . This is the replication of the Kosfeld et al.<sup>8</sup> study, as delineated in finding (i) in the section on the determination of the sample size.

**H2:** The influence of OT on trust in the MSC condition (which is given by  $\beta_1 + \beta_3$ ), is higher than the influence of OT on trust in the NoC condition (which is given by  $\beta_1$ ), that is,  $\beta_3 > 0$ .

In addition we formulate a third hypothesis about the influence of the MSC condition:

**H3:** In the placebo treatment, Trust is higher in the MSC condition than the NoC condition, i.e.,  $\beta_2 > 0$ .

As we do not have *a priori* expectations about the effect of OT in the NoC condition (i.e., whether  $\beta_1 > 0$ ), we do not formulate a hypothesis. Similarly, although our design enables us to check whether the influence of MSC on trust levels in the OT treatment (which concerns  $\beta_2 + \beta_3$ ) will be significantly different from zero, we consider this of secondary interest for the present study.

If the analysis yields a non-significant p-value, Bayesian hypothesis testing will be used to assess the relative evidence for the different hypothesis.<sup>61</sup> For example, a Bayesian analysis of  $H1 (\beta_1 + \beta_3 > 0)$  above computes whether the likelihood (L) of a model that captures the potential effect of OT ( $\beta_1$ ) and the interaction effect between OT and MSC ( $\beta_3$ ) is sufficiently more likely, given the data, than a model that assumes that both  $\beta_1$  and  $\beta_3$  are zero.

We will use the “regression BF” function in the Bayes Factor R package, using a JZS/Cauchy prior with a scaling constant of  $r=0.354$ , which corresponds to a prior with a medium width. We will also conduct robustness checks using larger values ( $r=0.5$  and  $r=0.707$ ) corresponding to wider and flatter prior distributions. For each hypothesis we test, we will compute a Bayes factor which provides an indication of how much more likely the hypothesized model is than the null model (i.e., no effect of Oxytocin on trust). We will consider a Bayes factor of 10 as sufficient evidence for the hypothesized model over the null model, a value that is considered “strong evidence” according to Jeffreys’ classification system<sup>62, 63</sup>.

The anonymized dataset generated and analyzed during the current study will be shared publicly.

## 449    **References**

- 450    1.        Insel, T.R. & Young, L.J. The neurobiology of attachment. *Nat. Rev. Neurosci.* **2**, 129–136  
451                (2001).
- 452    2.        Johnson, Z.V. & Young, L.J. Neurobiological mechanisms of social attachment and pair  
453                bonding. *Current Opinion in Behavioral Sciences* **3**, 38–44 (2015).
- 454    3.        Sue Carter, C. Neuroendocrine perspectives on social attachment and love.  
455                *Psychoneuroendocrinology* **23**, 779–818 (1998).
- 456    4.        Heinrichs, M., Baumgartner, T., Kirschbaum, C. & Ehlert, U. Social support and oxytocin  
457                interact to suppress cortisol and subjective responses to psychosocial stress. *Biol.*  
458                *Psychiatry* **54**, 1389–1398 (2003).
- 459    5.        Norman, G. J. et al. Oxytocin increases autonomic cardiac control: Moderation by  
460                loneliness. *Biol. Psychol.* **86**, 174–180 (2011).
- 461    6.        Kirsch, P. Oxytocin modulates neural circuitry for social cognition and fear in humans. *J.*  
462                *Neurosci.* **25**, 11489–11493 (2005).
- 463    7.        Lambert, B., Declerck, C.H., Boone, C. & Parizel, P.M. A functional MRI study on how  
464                oxytocin affects decision making in social dilemmas: Cooperate as long as it pays off,  
465                aggress only when you think you can win. *Horm. Behav.* **94**, 145–152 (2017).
- 466    8.        Kosfeld, M., Heinrichs, M., Zak, P.J., Fischbacher, U. & Fehr, E. Oxytocin increases trust in  
467                humans. *Nature* **435**, 673–676 (2005).
- 468    9.        Bohnet, I., Greig, F., Herrmann, B., & Zeckhauser, R. Betrayal aversion: Evidence from  
469                Brazil, China, Oman, Switzerland, Turkey, and the United States. *American Economic*  
470                *Review* **98**, 294–310 (2008).
- 471    10.       Fehr, E. On the economics and biology of trust. *Journal of European Economic*  
472                *Association*, **7**, 235–266. (2009).
- 473    11.       Heinrichs, M., von Dawans, B. & Domes, G. Oxytocin, vasopressin, and human social  
474                behavior. *Frontiers in Neuroendocrinology* **30**, 548–557 (2009).

- 475 12. Meyer-Lindenberg, A., Domes, G., Kirsch, P. & Heinrichs, M. Oxytocin and vasopressin in  
476 the human brain: social neuropeptides for translational medicine. *Nat. Rev. Neurosci.*  
477 **12**, 524–538 (2011).
- 478 13. van IJzendoorn, M.H. & Bakermans-Kranenburg, M.J. The role of oxytocin in parenting  
479 and as augmentative pharmacotherapy: Critical issues and bold conjectures. *J.*  
480 *Neuroendocrinol.* **28**, (2016).
- 481 14. Hurlemann, R. et al. Oxytocin enhances amygdala-dependent, socially reinforced  
482 learning and emotional empathy in humans. *J. Neurosci.* **30**, 4999–5007 (2010).
- 483 15. Hurlemann, R. & Marsh, N. Deciphering the modulatory role of oxytocin in human  
484 altruism. *Rev. Neurosci.* **28**, 335–342 (2017).
- 485 16. De Dreu, C.K.W. Oxytocin modulates cooperation within and competition between  
486 groups: An integrative review and research agenda. *Horm. Behav.* **61**, 419–428 (2012).
- 487 17. De Dreu, C.K.W. & Kret, M.E. Oxytocin conditions intergroup relations through  
488 upregulated in group empathy, cooperation, conformity, and defense. *Biol. Psychiatry*  
489 **79**, 165–173 (2016).
- 490 18. Walum, H., Waldman, I.D. & Young, L.J. Statistical and methodological considerations for  
491 the interpretation of intranasal oxytocin studies. *Biological Psychiatry* **79**, 251–257  
492 (2016).
- 493 19. Lane, A., Luminet, O., Nave, G. & Mikolajczak, M. Is there a publication bias in  
494 behavioural intranasal oxytocin research on humans? Opening the file drawer of one  
495 Laboratory. *J. Neuroendocrinol.* **28**, (2016).
- 496 20. Churchland, P.S. & Winkielman, P. Modulating social behavior with oxytocin: How does  
497 it work? What does it mean? *Hormones and Behavior* **61**, 392–399 (2012).
- 498 21. Nave, G., Camerer, C. & McCullough, M. Does oxytocin increase trust in humans? A  
499 critical review of research. *Perspect. Psychol. Sci.* **10**, 772–789 (2015).
- 500 22. Ross, H.E. & Young, L.J. Oxytocin and the neural mechanisms regulating social cognition  
501 and affiliative behavior. *Frontiers in Neuroendocrinology* **30**, 534–547 (2009).
- 502 23. Young, L.J. & Wang, Z. The neurobiology of pair bonding. *Nature Neuroscience* **7**, 1048–  
503 1054 (2004).

- 504 24. Balliet, D. Communication and cooperation in social dilemmas: A meta-analytic review.  
505 *J. Conflict Resolut.* **54**, 39–57 (2009).
- 506 25. Ebert, A. et al. Modulation of interpersonal trust in borderline personality disorder by  
507 intranasal oxytocin and childhood trauma. *Soc. Neurosci.* **8**, 305–313 (2013).
- 508 26. Klackl, J., Pfundmair, M., Agroskin, D. & Jonas, E. Who is to blame? Oxytocin promotes  
509 nonpersonalistic attributions in response to a trust betrayal. *Biol. Psychol.* **92**, 387–394  
510 (2013).
- 511 27. Mikolajczak, M. et al. Oxytocin makes people trusting, not gullible. *Psychol. Sci.* **21**,  
512 1072–1074 (2010).
- 513 28. Yao, S. et al. Oxytocin makes females, but not males, less forgiving following betrayal of  
514 trust. *Int. J. Neuropsychopharmacol.* **17**, 1785–1792 (2014).
- 515 29. Baumgartner, T., Heinrichs, M., Vonlanthen, A., Fischbacher, U. & Fehr, E. Oxytocin  
516 shapes the neural circuitry of trust and trust adaptation in humans. *Neuron* **58**, 639–650  
517 (2008).
- 518 30. Barraza, J.A. The physiology of empathy: Linking oxytocin to empathic responding. *Diss.*  
519 *Abstr. Int. Sect. B Sci. Eng.* **71**, 4537 (2011).
- 520 31. Declerck, C.H., Boone, C. & Kiyonari, T. Oxytocin and cooperation under conditions of  
521 uncertainty: The modulating role of incentives and social information. *Horm. Behav.* **57**,  
522 368–374 (2010).
- 523 32. Shamay-Tsoory, S.G., Fiscer, M., Dvash, J., Harari, H., Perach-Bloom, N., Levkovitz, Y.  
524 Intranasal administration of oxytocin increases envy and schadenfreude (gloating). *Biol.*  
525 *Psychiatry* **66**, 864–70 (2009).
- 526 33. Bartz, J.A., Zaki, J., Bolger, N. & Ochsner, K.N. Social effects of oxytocin in humans:  
527 Context and person matter. *Trends in Cognitive Sciences* **15**, 301–309 (2011).
- 528 34. Olff, M. et al. The role of oxytocin in social bonding, stress regulation and mental health:  
529 An update on the moderating effects of context and interindividual differences.  
530 *Psychoneuroendocrinology* **38**, 1883–1894 (2013).
- 531 35. Love, T.M. Oxytocin, motivation and the role of dopamine. *Pharmacology Biochemistry*  
532 *and Behavior* **119**, 49–60 (2014).



- 533 36. Shamay-Tsoory, S.G. & Abu-Akel, A. The Social Salience Hypothesis of Oxytocin.  
534 *Biological Psychiatry* **79**, 194–202 (2016).
- 535 37. Sawilowski, S. S. (2009). New effect size rules of thumb. *Journal of Modern Applied*  
536 *Statistical Methods* **8**, article 26 (2009).
- 537 38. Cho, H. & Abe, S. Is two-tailed testing for directional research hypotheses tests  
538 legitimate? *Journal of Business Research* **66**,1261-1266 (2013).
- 539 39. Simonsohn, U. Small telescopes: detectability and the evaluation of replication results.  
540 *Psychological Science* **26**, 559-569 (2015).
- 541 40. MacDonald, K.S. Sex, receptors, and attachment: a review of individual factors  
542 influencing response to oxytocin. *Frontiers in Neuroscience* **6**, Article 194. (2013).
- 543 41. Lipan, M.J. & Most, S.P. Development of a Severity Classification System for Subjective  
544 Nasal Obstruction *JAMA Facial Plast Surg.* **15**, 358-361 (2013).
- 545 42. Van Zijl. F.V.W., Timman, R., & Datema, F.R. Adaptation and validation of the Dutch  
546 version of the nasal obstruction symptom evaluation (NOSE) scale. *Eur Arch*  
547 *Otorhinolaryngol.* **274**, 2469–2476 (2017).
- 548 43. Teixeira RUF, Zappelini CEM, Oliveira LG, Basile LCG, Costa EA. Correlation Between the  
549 Peak Nasal Inspiratory Flow and the Visual Analogue Scale (VAS) Before and After Using  
550 a Nasal Decongestant. *Int. Arch. Otorhinolaryngol.* **15**, 156-162 (2011).
- 551 44. Hsu, H.C., Tan, C.D., Chang, C.W., Chu, C.W.,Chiu, Y.C. et al. Evaluation of nasal patency  
552 by visual analogue scale/nasal obstruction symptom evaluation questionnaires and  
553 anterior active rhinomanometry after septoplasty: a retrospective one-year follow-up  
554 cohort study. *Clinical Otolaryngology* **42**, 53–59 (2016).
- 555 45. Berg, J., Dickhaut, J. & McCabe, K. Trust, reciprocity and social history. *Games Econ.*  
556 *Behav.* **10**, 122–142 (1995).
- 557 46. Ten Velden, F.S., Daughters, K. & De Dreu, C.K.W. Oxytocin promotes intuitive rather  
558 than deliberated cooperation with the in-group. *Horm. Behav.* **92**, 164–171 (2017).
- 559 47. Fischbacher, U. z-Tree: Zurich toolbox for ready-made economic experiments. *Exp. Econ.*  
560 **10**, 171–178 (2007).

- 561 48. Van Lange, P.A.M. Beyond Self-interest: A set of propositions relevant to interpersonal  
562 orientations. *Eur. Rev. Soc. Psychol.* 11, 297–331 (2000).
- 563 49. Yamagishi, T. et al. Two-component model of general trust: Predicting behavioral trust  
564 from attitudinal trust. *Soc. Cogn.* **33**, 436–458 (2015).
- 565 50. Boone, C., Declerck, C.H. & Kiyonari, T. Inducing cooperative behavior among proselves  
566 versus prosocials: The moderating role of incentives and trust. *J. Conflict Resolut.* **54**,  
567 799–824 (2010).
- 568 51. Spengler, F. B., Schultz, J., Scheele, D., Essel, M., Maier, W. et al. Kinetics and dose  
569 dependency of intranasal oxytocin effects on amygdala reactivity. *Biological Psychiatry*  
570 **82**, 885–894, (2017).
- 571 52. Quintana, D.S., Westlye, L.T., Alnaes, D., Rustan, O.G., Kaufmann, T., et al. Low dose  
572 intranasal oxytocin delivered with Breath Powered device dampens amygdala response  
573 to emotional stimuli: a peripheral effect-controlled within-subject randomized dose-  
574 response fMRI trial. *Psychoneuroendocrinology* **69**, 180-188 (2016).
- 575 53. Quintana, D.S., Guastella, A.J., Westlye, L.T., & Andreassen, O.A. The promise and  
576 pitfalls of intranasally administering psychopharmacological agents for the treatment of  
577 psychiatric disorders. *Molecular Psychiatry* **21**, 29-38 (2016).
- 578 54. Guastella, A.J. et al. Recommendations for the standardisation of oxytocin nasal  
579 administration and guidelines for its reporting in human research.  
580 *Psychoneuroendocrinology* **38**, 612–625 (2013).
- 581 55. Falk, A., Becker, A., Dohmen, T., Huffman, D. & Sunde, U. The preference survey module:  
582 A validated instrument for measuring risk, time, and social preferences. *IZA Discuss. Pap.*  
583 *Ser.* (2016).
- 584 56. Auyeung, A.C. & Baron-Cohen, S. Toward brief “red flags” for autism screening: the  
585 short autism spectrum quotient and the short quantitative checklist for autism in  
586 toddlers in 1,000 cases and 3,000 controls. *Journal of the American Academy of Child*  
587 *and Adolescent Psychiatry* **51**, 202-212 (2012)
- 588 57. Lee, K. & Ashton, M.C. Psychometric Properties of the HEXACO-100. Assessment (2016).  
589 doi:10.1177/1073191116659134

58. Steyer, R., Schwenkmezger, P., Notz, P. & Eid, M. MDBF Mehrdimensionaler Befindlichkeitsfragebogen. Der Mehrdimensionale Befindlichkeitsfragebogen (MDBF) Testmappe mit Handanweisung, 10 Fragebogen Langform, 10 Fragebogen Kurzform A, 10 Fragebogen Kurzform B und Schablone. Goettingen: Hogrefe. Bibliotheksstandort: Testsammlung Psychologie des Sondersa (1997).
59. Suk, H.-J. & Irtel, H. Color and emotion: A study on the affective judgment of color across media and in relation to visual stimuli. *Technology*, **232** (2006).
60. Dieleman, G.C., van der Ende, J., Verhulst, F.C. & Huizink, A.C. Perceived and physiological arousal during a stress task: Can they differentiate between anxiety and depression? *Psychoneuroendocrinology* **35**, 1223–1234 (2010).
61. Quintana, D.S. & Willams, D.R. Bayesian alternatives for common null-hypothesis significance tests in psychiatry: a non-technical guide using JASP. *BMC Psychiatry* **18**, 178 (2018).
62. Schönbrodt, F.D. & Wagenmakers, E. Bayes factor design analysis: planning for compelling evidence. *Psychonomic Bulletin & Review*, **25**, 128-142 (2018).
63. Jeffreys, H. The theory of probability. Oxford University Press (1961).

## Acknowledgments

Funding for this study has been provided by the University of Zurich. The funder had no role in study design, decision to publish or preparation of the manuscript.

## Author contributions

C.D., C.B., B.V. and E.F. developed the idea of a replication study that controls for minimal social contacts; C.D., C.B., B.V. and E.F. designed the study with contributions from L.P.; C.D., C.B., B.V. and E.F. wrote the preregistration report; C.D. and B.V. will supervise and conduct the data collection.

## Competing interests

The authors declare no competing interests

## Supplementary Information

**Supplementary Table 1.** A priori sample size computation using the G\*Power 3.1.9.2 28 software<sup>1</sup>

| <b>t-tests:</b> Difference between two independent means (two groups) |                                        |              |
|-----------------------------------------------------------------------|----------------------------------------|--------------|
| <b>Analysis</b>                                                       | A priori: compute required sample size |              |
| <b>Input</b>                                                          | Tail(s)                                | <b>One</b>   |
|                                                                       | Effect size d                          | <b>0.514</b> |
|                                                                       | $\alpha$ error prob                    | <b>0.05</b>  |
|                                                                       | Power (1- $\beta$ error prob)          | <b>0.95</b>  |
|                                                                       | Allocation ration N2/N1                | <b>1</b>     |
| <b>Output</b>                                                         | Noncentrality parameter $\delta$       | <b>3.311</b> |
|                                                                       | Critical t                             | <b>1.654</b> |
|                                                                       | DF                                     | <b>164</b>   |
|                                                                       | Sample size group 1                    | <b>83</b>    |
|                                                                       | Sample size group 2                    | <b>83</b>    |
|                                                                       | Total sample size                      | <b>166</b>   |
|                                                                       | Actual power                           | <b>0.951</b> |

**Supplementary Table 2.** Simonsohn's small telescopes approach<sup>2</sup> to assess the adequacy of the sample size of a replication study. This method assesses whether the replication study has 80% power to detect an effect size the original study had 33% power to detect.

| <b>t-tests:</b> Difference between two independent means (two groups) |                                                                                        |       |
|-----------------------------------------------------------------------|----------------------------------------------------------------------------------------|-------|
| <b>Analysis – Step 1</b>                                              | Compute required effect size for the Kosfeld et al. <sup>3</sup> study with 33 % power |       |
| <b>Input</b>                                                          | Tail(s)                                                                                | One   |
|                                                                       | $\alpha$ error prob                                                                    | 0.05  |
|                                                                       | Power (1- $\beta$ error prob)                                                          | 0.33  |
|                                                                       | Sample size group 1                                                                    | 29    |
|                                                                       | Sample size group 2                                                                    | 29    |
| <b>Output</b>                                                         | Noncentrality parameter $\delta$                                                       | 1.220 |
|                                                                       | Critical t                                                                             | 1.672 |
|                                                                       | DF                                                                                     | 56    |
|                                                                       | Effect size d                                                                          | 0.320 |
| <b>Analysis – Step 2</b>                                              | Compute required sample size using d = 0.32                                            |       |
| <b>Input</b>                                                          | Tail(s)                                                                                | One   |
|                                                                       | Effect size d                                                                          | 0.320 |
|                                                                       | $\alpha$ error prob                                                                    | 0.05  |
|                                                                       | Power (1- $\beta$ error prob)                                                          | 0.80  |
|                                                                       | Allocation ration N2/N1                                                                | 1     |
| <b>Output</b>                                                         | Noncentrality parameter                                                                | 2.502 |
|                                                                       | Critical t                                                                             | 1.651 |
|                                                                       | Sample size group 1                                                                    | 122   |
|                                                                       | Sample size group 2                                                                    | 122   |
|                                                                       | Total sample size                                                                      | 244   |
|                                                                       | Actual Power                                                                           | 0.802 |

### Supplementary Table 3. Mean Investments in the Trust game across 11 pilot sessions

Supplementary Table 3 documents our effort to develop an experimental design that implements a trust game with and without a minimal social contact condition but which avoids introducing a ceiling effect for a potential impact of OT. For example, in experimental sessions 2, 5 and 7 below (which implemented the Social 1 condition or the Social 1\* condition, for a detailed explanation of these conditions see text after Table S3) the average behavioral trust level was 8.875, 10.875 and 9.437, respectively. These trust levels are very high and leave little space for OT to have an effect in these conditions. Therefore, we conducted further pilots with a Social 2 and a Social 3 condition ( see pilot sessions 9 – 11) which tried to mitigate these potential ceiling effects while still allowing for minimal social contact among the subjects.

| #  | DATE        | Place     | N  | Condition  | Stakes     | Show-up fee | Gender | Invest options        | Mean investment |
|----|-------------|-----------|----|------------|------------|-------------|--------|-----------------------|-----------------|
| 1  | 15-Dec 2017 | Antwerp   | 14 | No contact | 1pt = 33 c | 5 €         | mixed  | all integers (0 – 12) | 8.786           |
| 2  | 15-Dec 2017 | Antwerp   | 16 | Social 1   | 1pt = 33 c | 5 €         | mixed  | all integers (0 – 12) | 8.875           |
| 3  | 16-Jan 2018 | Magdeburg | 16 | No contact | 1pt = 1€   | 5 €         | mixed  | all integers (0 – 12) | 7.313           |
| 4  | 17-Jan 2018 | Magdeburg | 16 | No contact | 1pt = 33 c | 5 €         | mixed  | all integers (0 – 12) | 8.813           |
| 5  | 17-Jan 2018 | Magdeburg | 16 | Social 1*  | 1pt = 33 c | 5 €         | mixed* | all integers (0 – 12) | 10.875          |
| 6  | 1-Feb 2018  | Magdeburg | 16 | No contact | 1pt = 1€   | none        | mixed  | all integers (0 – 12) | 6.936           |
| 7  | 1-Feb 2018  | Magdeburg | 16 | Social 1   | 1pt = 1€   | none        | mixed  | all integers (0 -12)  | 9.437           |
| 8  | 3-Mar 2018  | Magdeburg | 16 | No contact | 1pt = 1€   | none        | males  | 0, 4, 8, 12           | 8.250           |
| 9  | 3-Mar 2018  | Magdeburg | 16 | Social 2   | 1pt = 1€   | none        | males  | 0, 4, 8, 12           | 7.500           |
| 10 | 16 Mar 2018 | Magdeburg | 16 | Social 3   | 1pt = 1€   | none        | males  | all integers (0 – 12) | 8.100           |
| 11 | 16 Mar 2018 | Magdeburg | 16 | Social 3   | 1pt = 1€   | none        | males  | 0, 4, 8, 12           | 8.000           |

The social conditions are defined as follows. In **Social 1**, after being seated and having signed the informed consent form in the experimental room, eight participants were called to meet each other briefly (5 minutes) in a smaller room (different from the experimental room where the trust game would be played). They were seated at the same table and then asked to formally introduce themselves by name, mention their hobby, and shake hands with each other, following the Prior Contact condition described in Declerck et al. (2010)<sup>3</sup>. In **Social 1\*** (pilot session 5), the experimental rooms were separated by gender (i.e., men and women were not seated in the same room when they arrived or when they were performing the trust game). During the social contact moment, four males from one room met four females from another room and introduced themselves following the same procedures as in Social 1. This led to very high trust levels. In **Social 2** (pilot session 9), eight male participants met in the smaller room without introducing themselves. They were seated at the same table and waited together for 5 minutes during which they did not speak

with each other. This complete lack of verbal interaction caused a strange and awkward situation that was associated with reduced investments. In **Social 3** (pilot session 10 and 11), we combined the procedures of Declerck et al (2010)<sup>3</sup> and Kosfeld et al. (2005)<sup>4</sup>: eight male participants, coming from 2 separate experimental rooms where the trust game was to be played, met in a smaller room. They were not asked to formally introduce themselves, but were told that they were permitted to talk, should they wish to do so. During the 8 minutes that they waited together, they were sitting at the same table and filled out questionnaires (see main text). These procedures were examined once with a “continuous” action space for the investor (i.e., investments from 0 – 12 were possible; in session 10) and once with a restricted investment space (only investments 0, 4, 8 and 12 were possible; session 11). Pilot session 8, which implements the no-contact condition, otherwise matches the procedures of session 11.

There were also the **following procedural differences** between the various pilot sessions. In **session 1 and 2** participants sat in computer rooms without cubicles; in all other session, participants sat in cubicles the entire time, except during the social contact manipulation in the non-experimental (“smaller”) room. In **sessions 1-5** participants arrived at an agreed upon place where they waited together until the beginning of the experiment. In **sessions 6-11**, participants were guided immediately to their cubicles upon arrival. This minimizes the contact with other participants before the experiment and increases our control over subjects social contacts. The show up fee was removed in **sessions 6-11** for the following reason. We hypothesized that if subjects receive a show-up fee of €5 they are more willing to take social risks in the trust game, i.e., more willing to send their whole endowment of €12 in the trust game, which exacerbates the ceiling problem discussed above. Instead of giving them a show-up fee of €5 before the trust game we remunerated them ex-post with €5 for filling out questionnaires.

**Supplementary Table 3b.** Mean investments by gender in the mixed gender sessions 1-6

| # | Condition  | Mean all | Males          | Females        |
|---|------------|----------|----------------|----------------|
| 1 | No contact | 8.786    | 10.6<br>(n=5)  | 7.8<br>(n=9)   |
| 2 | Social 1   | 8.875    | 7.0<br>(n=10)  | 12.0<br>(n=6)  |
| 3 | No contact | 7.313    | 6.5<br>(n=8)   | 8.125<br>(n=8) |
| 4 | No contact | 8.813    | 10.5<br>(n=8)  | 7.13<br>(n=8)  |
| 5 | Social 1*  | 10.875   | 10.75<br>(n=8) | 11<br>(n=8)    |
| 6 | No contact | 6.936    | 8.75<br>(n=8)  | 5.125<br>(n=8) |
| 7 | Social 1   | 9.437    | 9<br>(n=8)     | 9.875<br>(n=8) |

The above table shows that in several of the first 6 sessions there were substantial gender differences in trust. To avoid this source of variation we decided to conduct the experiment with only male subjects.

**Supplementary Table 4.** Guidelines for OT administration, based on recommendations by Guastella et al., 2013<sup>5</sup>.

|          |                                                                                                                                                                                                 |
|----------|-------------------------------------------------------------------------------------------------------------------------------------------------------------------------------------------------|
| <b>1</b> | If necessary, clear your nose from any obstruction (box of tissues provided).                                                                                                                   |
| <b>2</b> | Prime the bottle and complete a test spray in the air.                                                                                                                                          |
| <b>3</b> | Sit comfortably and keep the head in an upright position.                                                                                                                                       |
| <b>4</b> | Close one nostril with one finger while administering the spray to the other nostril.                                                                                                           |
| <b>5</b> | Insert bottle 1 cm into the nostril and keep the tip of the bottle at a 45 degree angle into the nose. Aim towards the upper lateral part of the nose (and not towards the middle of the nose). |
| <b>6</b> | Upon delivery, inhale and breathe in lightly. Do not sniff exaggeratedly.                                                                                                                       |
| <b>7</b> | Alternate administrations between nostrils. Allow time between each re-administration to the same nostril of at least 15 seconds.                                                               |



**Supplementary Figure 1.** Technical details of finger sprayer used to deliver OT/placebo. Figure reproduced with permission from Pharma-pack, Wilrijk (Belgium).

# PTY-29,1

## Finger-Sprayer

### TECHNICAL DRAWING AND MATERIAL SPECIFICATION

Rev : 03 • Date : 03<sup>rd</sup> of February 2016

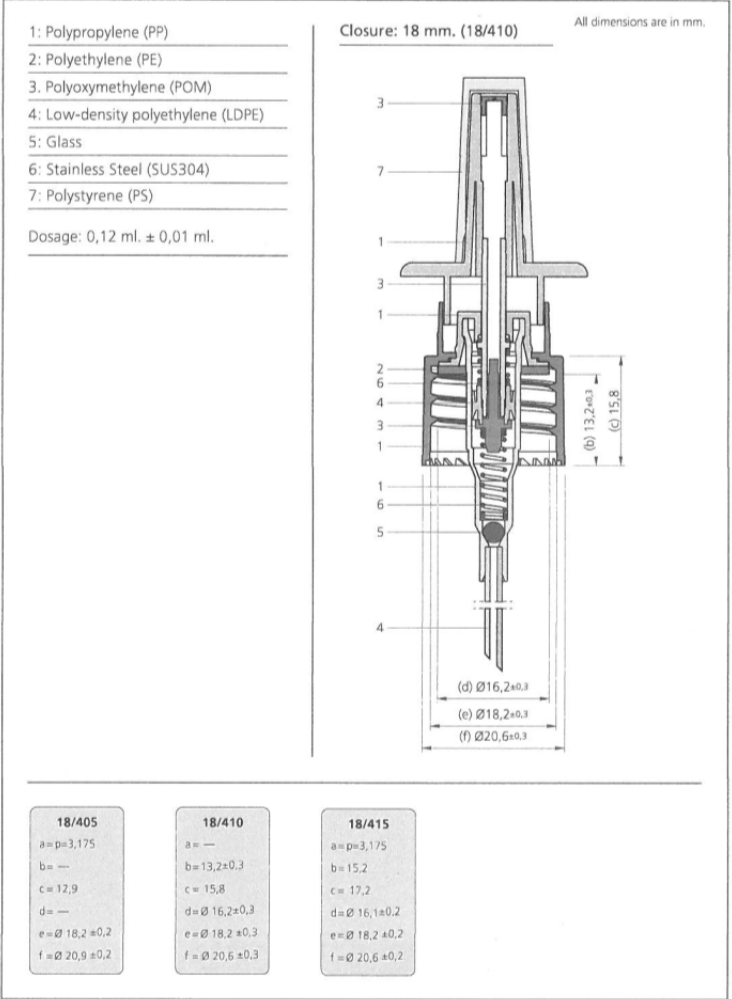

**Supplementary Figure 2.** Comparison of the distributions of investment decisions in the pilot studies conducted in Antwerp (N = 14, session 1) and Magdeburg (N = 16, session 4). Experimental conditions are kept the same: no contact, mixed genders, low stakes ( 1 point = 33 cent) but with a show-up fee.

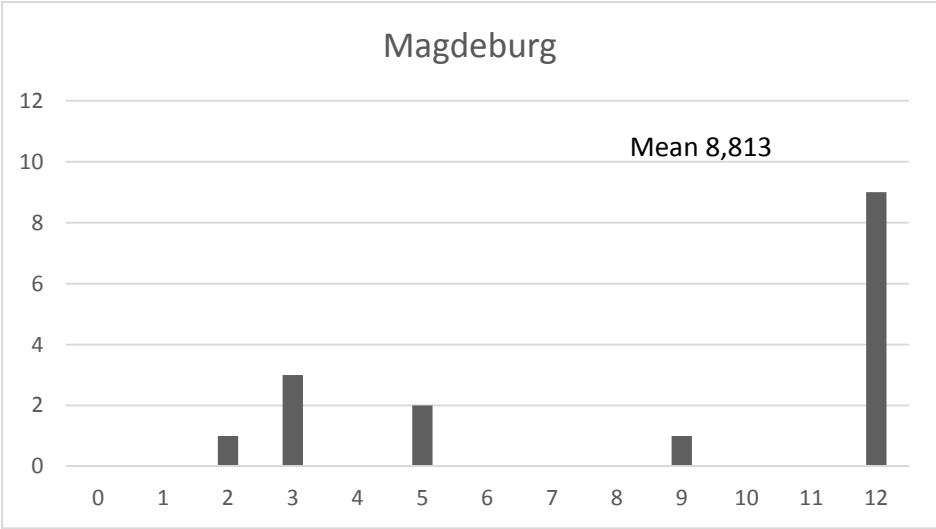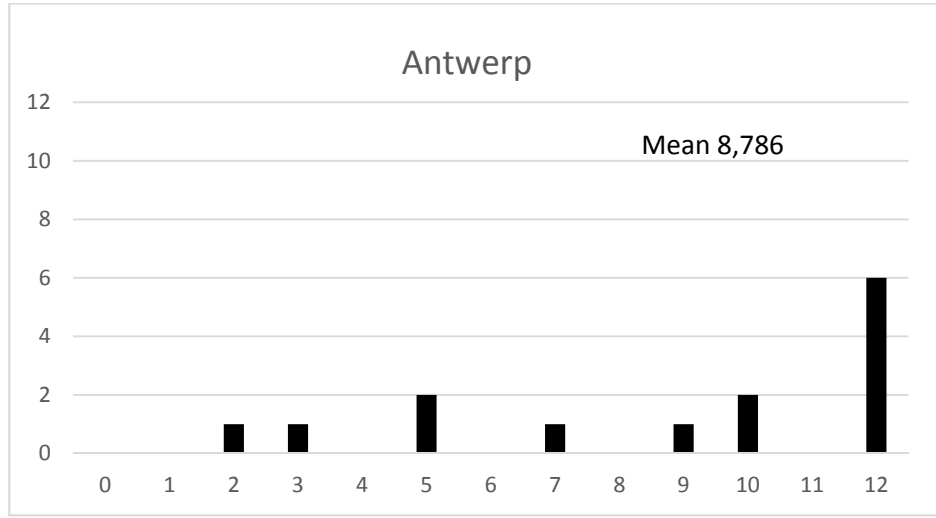

103

104 **Supplementary References**

105 1. Faul, F., Erdfelder, E., Buchner, A., & Lang, A.-G. (2009). Statistical power analyses using  
106 G\*Power 3.1: Tests for correlation and regression analyses. *Behavior Research*  
107 *Methods*, *41*, 1149-1160.

108

109 2. Simonsohn, U. Small telescopes: detectability and the evaluation of replication results.  
110 *Psychological Science* **26**, 559-569 (2015).

111

112 3. Declerck, C.H., Boone, C. & Kiyonari, T. Oxytocin and cooperation under conditions of  
113 uncertainty: The modulating role of incentives and social information. *Horm. Behav.* **57**,  
114 368–374 (2010).

115

116

117 4. Kosfeld, M., Heinrichs, M., Zak, P.J., Fischbacher, U. & Fehr, E. Oxytocin increases trust in  
118 humans. *Nature* **435**, 673–676 (2005).

119

120 5. Guastella, A.J. et al. Recommendations for the standardisation of oxytocin nasal  
121 administration and guidelines for its reporting in human research.  
122 *Psychoneuroendocrinology* **38**, 612–625 (2013).

123
